# Supplementary material for: Oxazole-modified glycopeptides that target arthritis-associated class II MHC Aq and DR4 proteins
Source: Royal Society of Chemistry journal article supplement (doi:10.1039/c003640d), 2010-01-01

*Supporting Information for Org. Biomol. Chem.*

# **Oxazole glycopeptidomimetics that target arthritis-associated class II MHC proteins**

**Ida E. Andersson,<sup>a</sup> Tsvetelina Batsalova,<sup>b</sup> Balik Dzhambazov,<sup>b</sup> Lotta Edvinsson,<sup>a</sup> Rikard  
Holmdahl,<sup>b</sup> Jan Kihlberg,<sup>\*,a,c</sup> and Anna Linusson<sup>\*,a</sup>**

<sup>a</sup> *Department of Chemistry, Umeå University, SE-901 87 Umeå, Sweden*

<sup>b</sup> *Medical Inflammation Research, Department of Medical Biochemistry and Biophysics,  
Karolinska Institute, SE-171 77 Stockholm, Sweden.*

<sup>c</sup> *AstraZeneca R&D Mölndal, SE-431 83 Mölndal, Sweden.*

*E-mail: jan.kihlberg@chem.umu.se, anna.linusson@chem.umu.se*

## **Table of Contents**

S2: <sup>1</sup>H and <sup>13</sup>C NMR for compound **7**

S3: <sup>1</sup>H and <sup>13</sup>C NMR for compound **8**

S4: <sup>1</sup>H and <sup>13</sup>C NMR for compound **11**

S5: <sup>1</sup>H and <sup>13</sup>C NMR for compound **12**

S6: <sup>1</sup>H and <sup>13</sup>C NMR for compound **13**

S7: <sup>1</sup>H and <sup>13</sup>C NMR for compound **14**

S8: HPLC chromatograms for glycopeptides **2, 3, and 4**

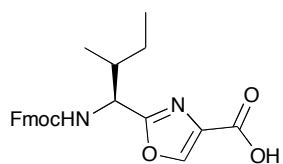

7

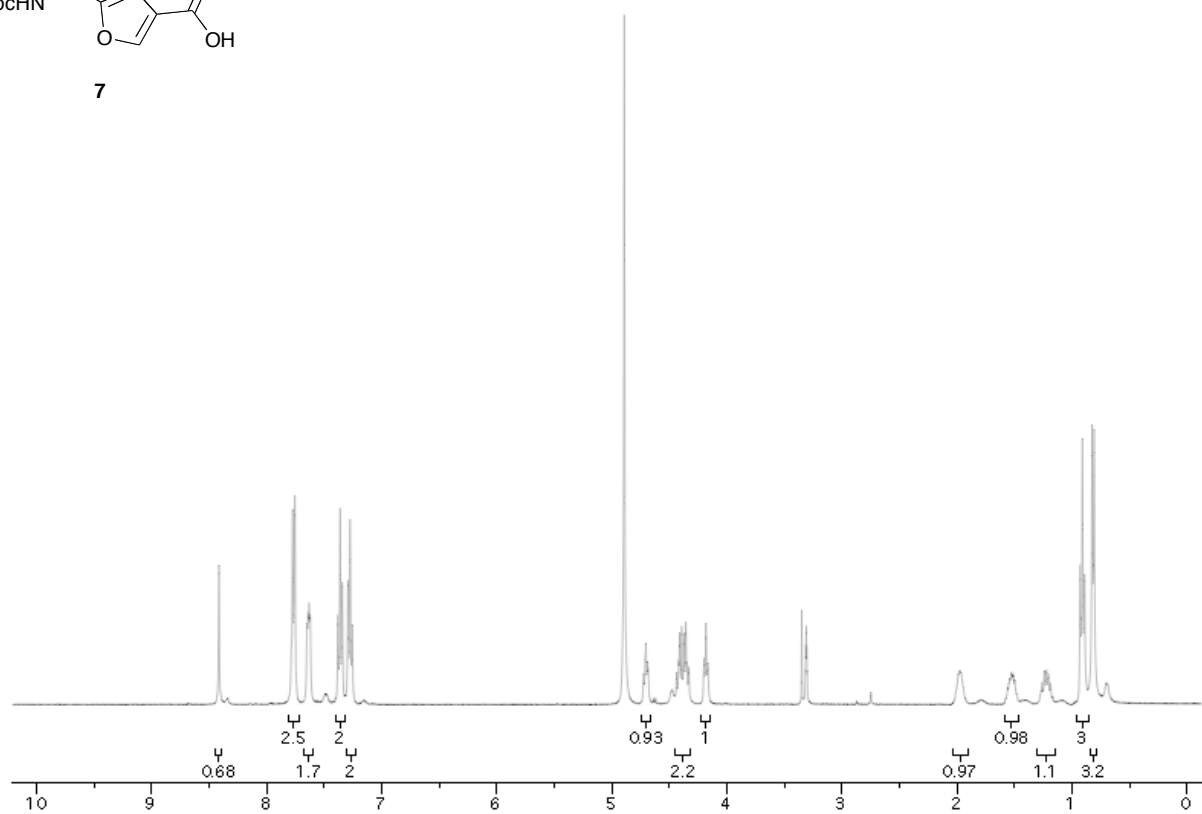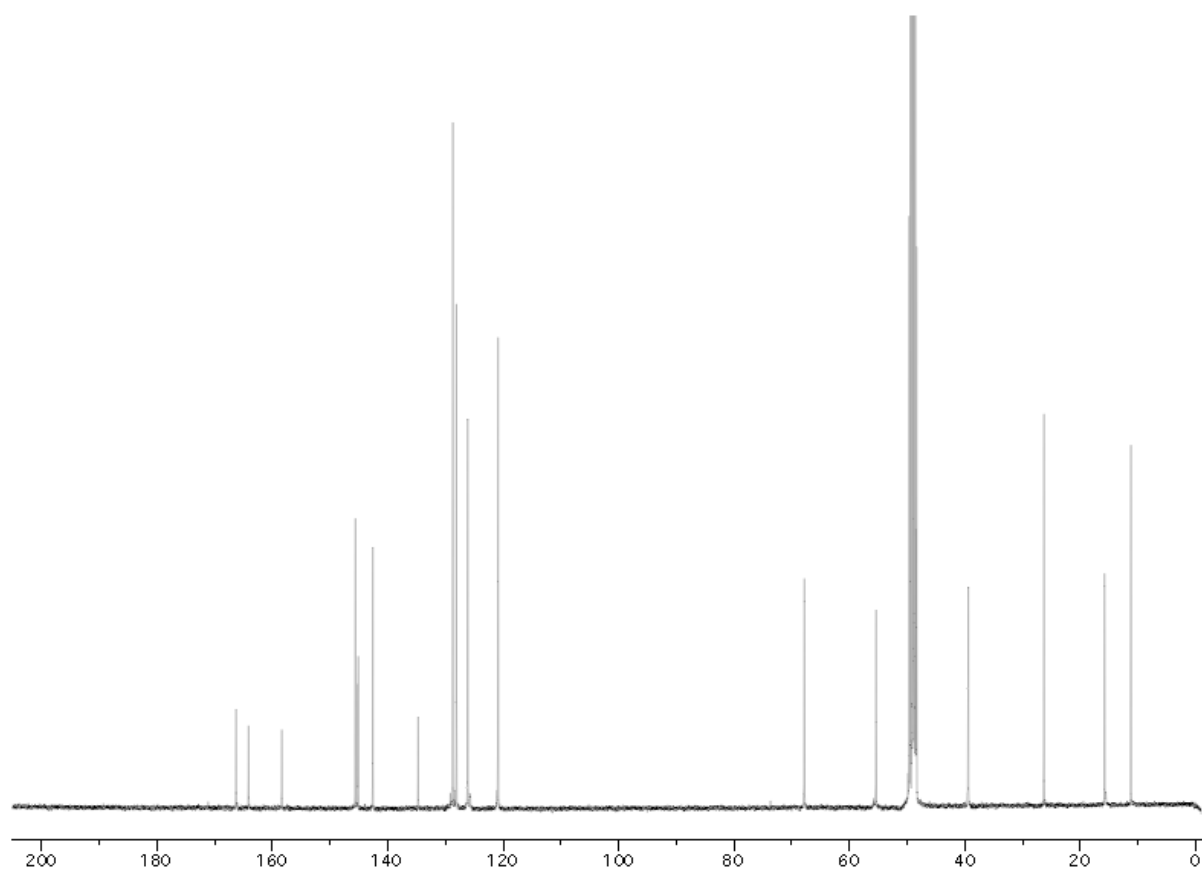

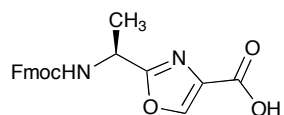

8

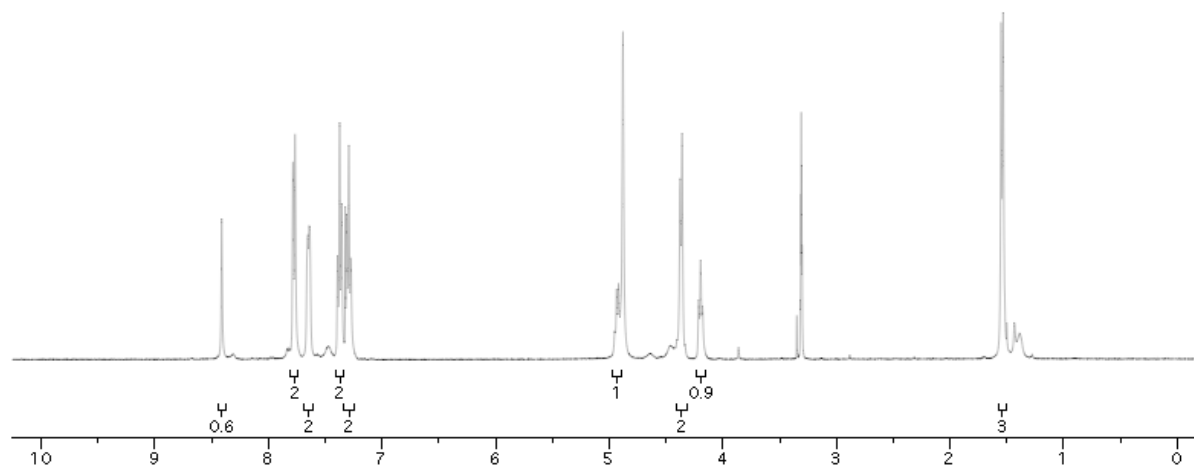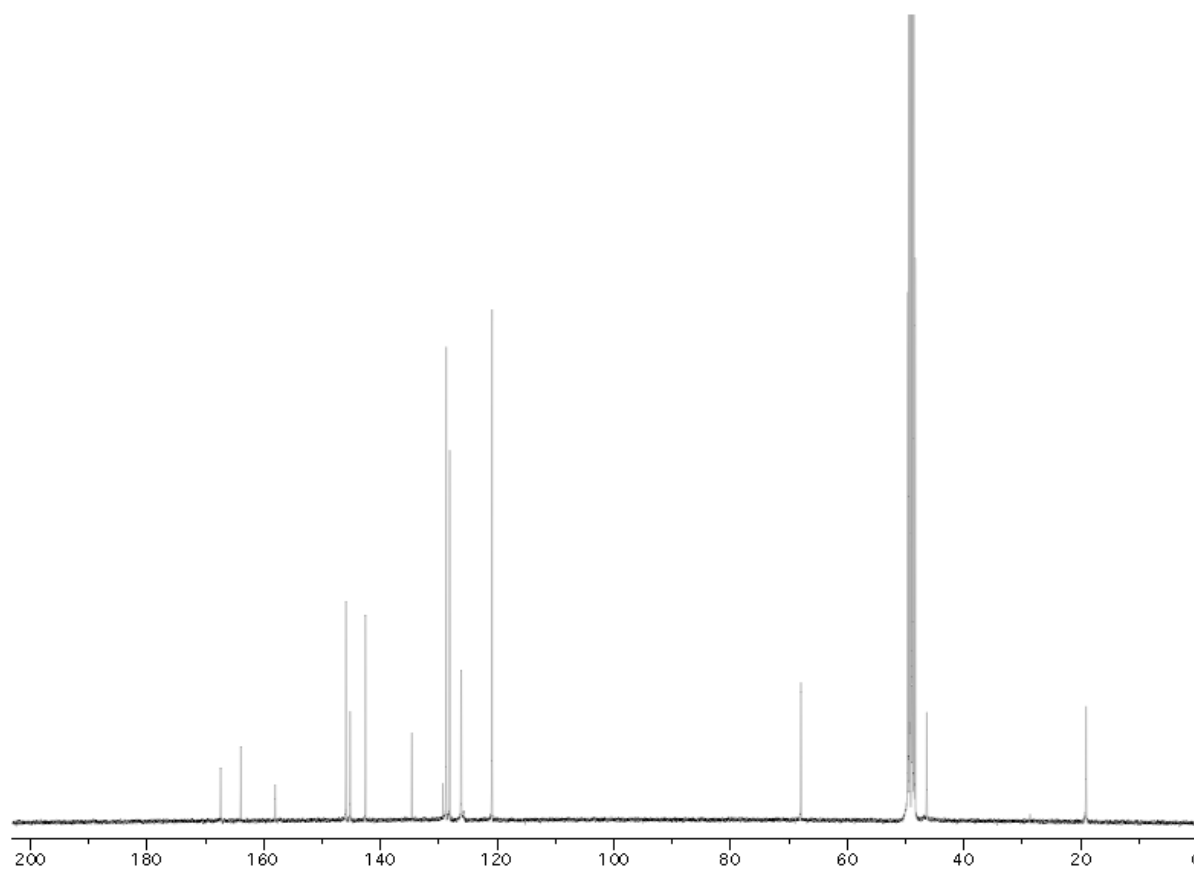

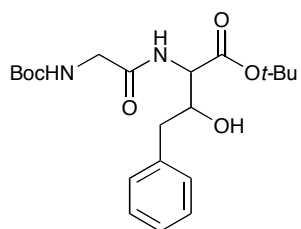

11

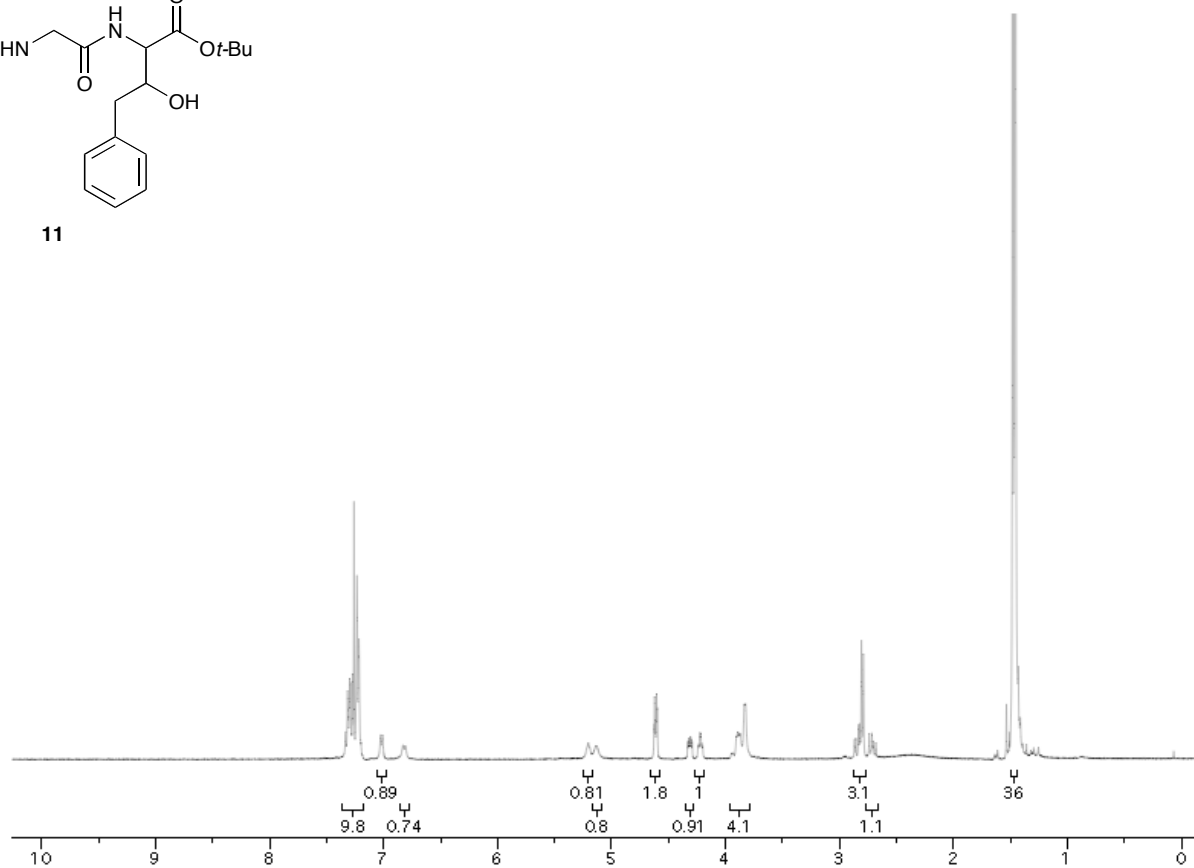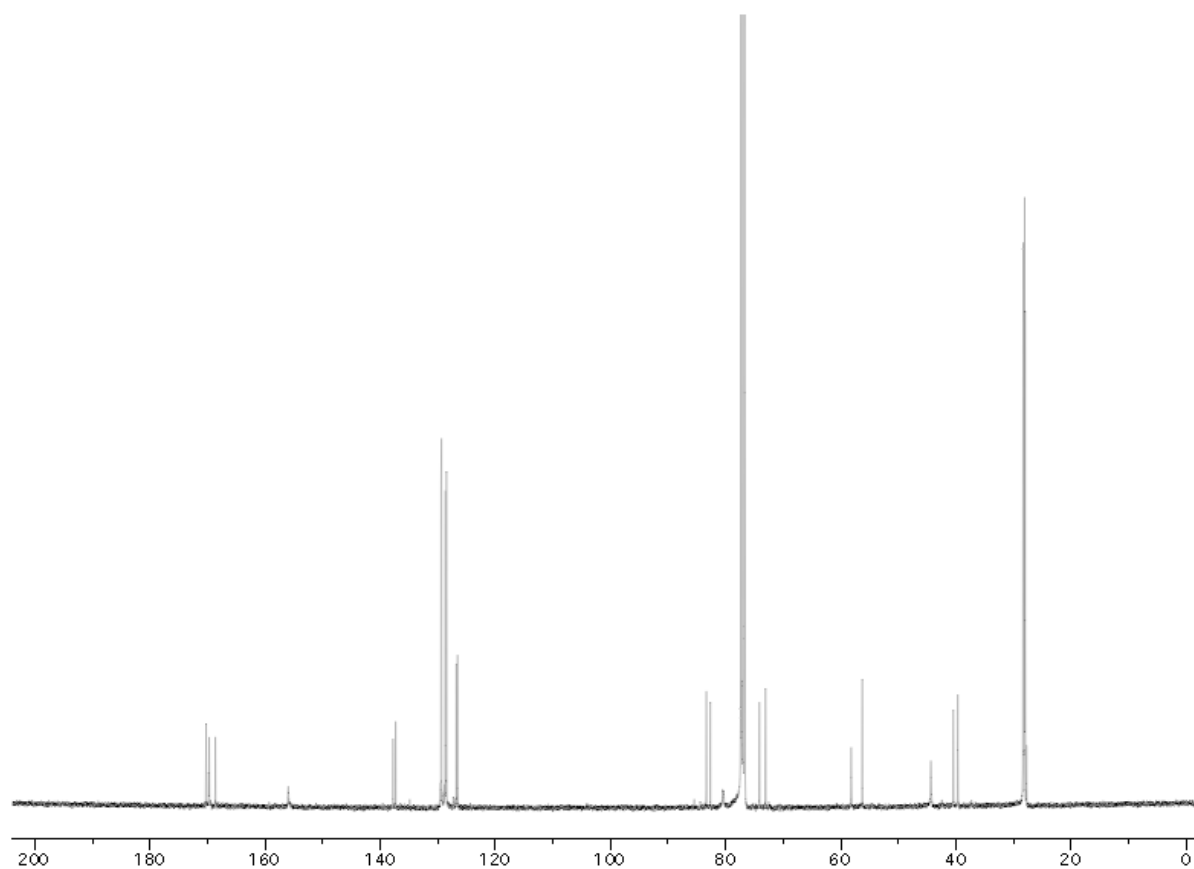

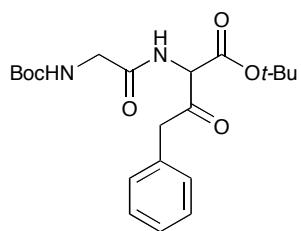

12

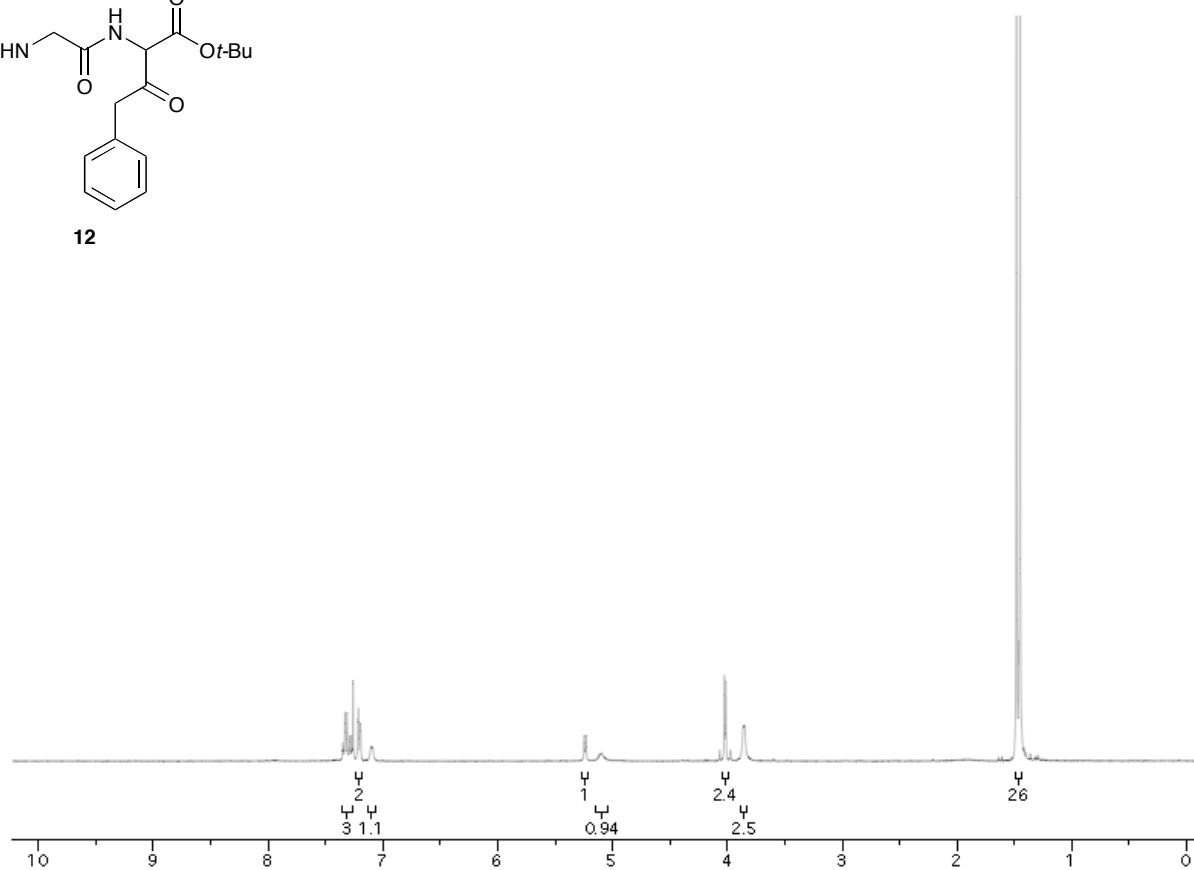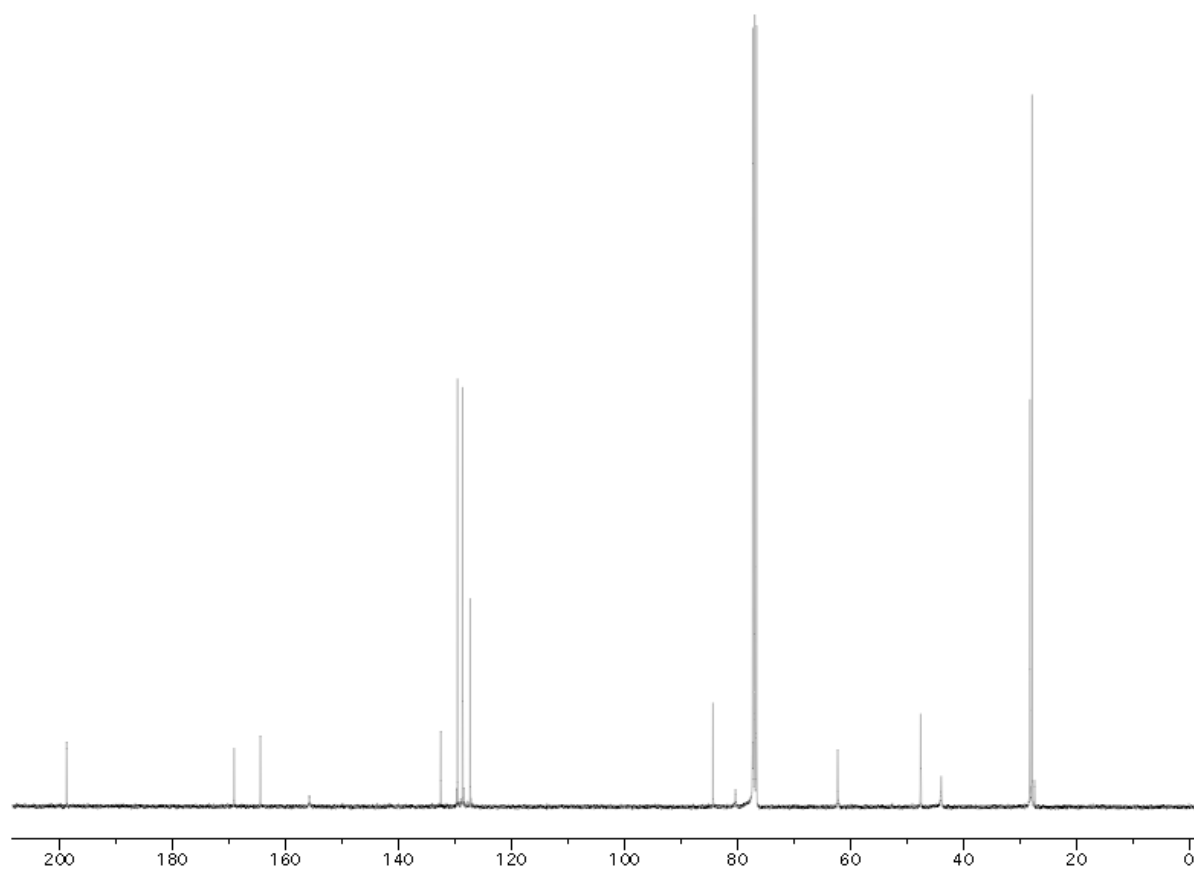

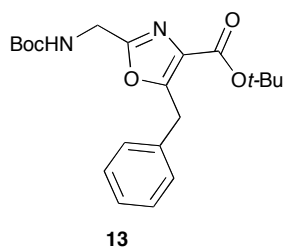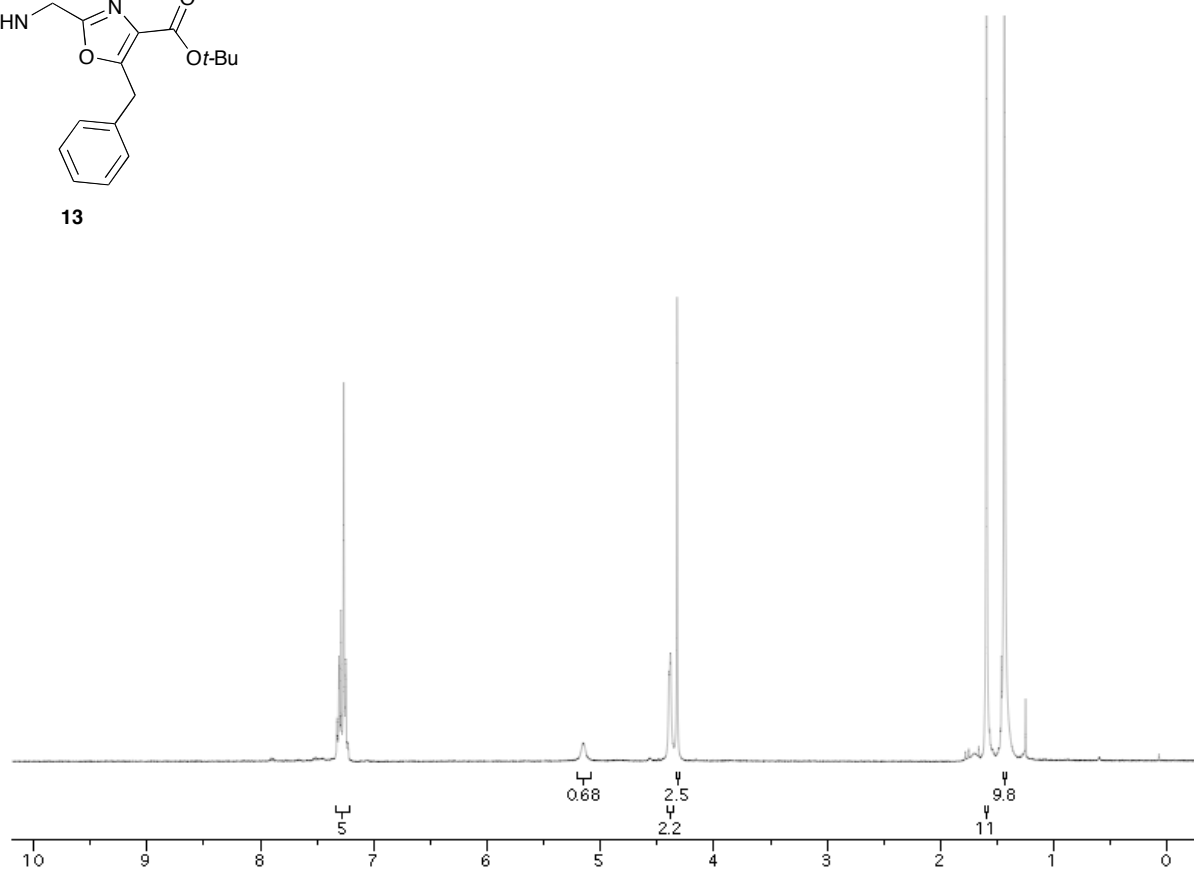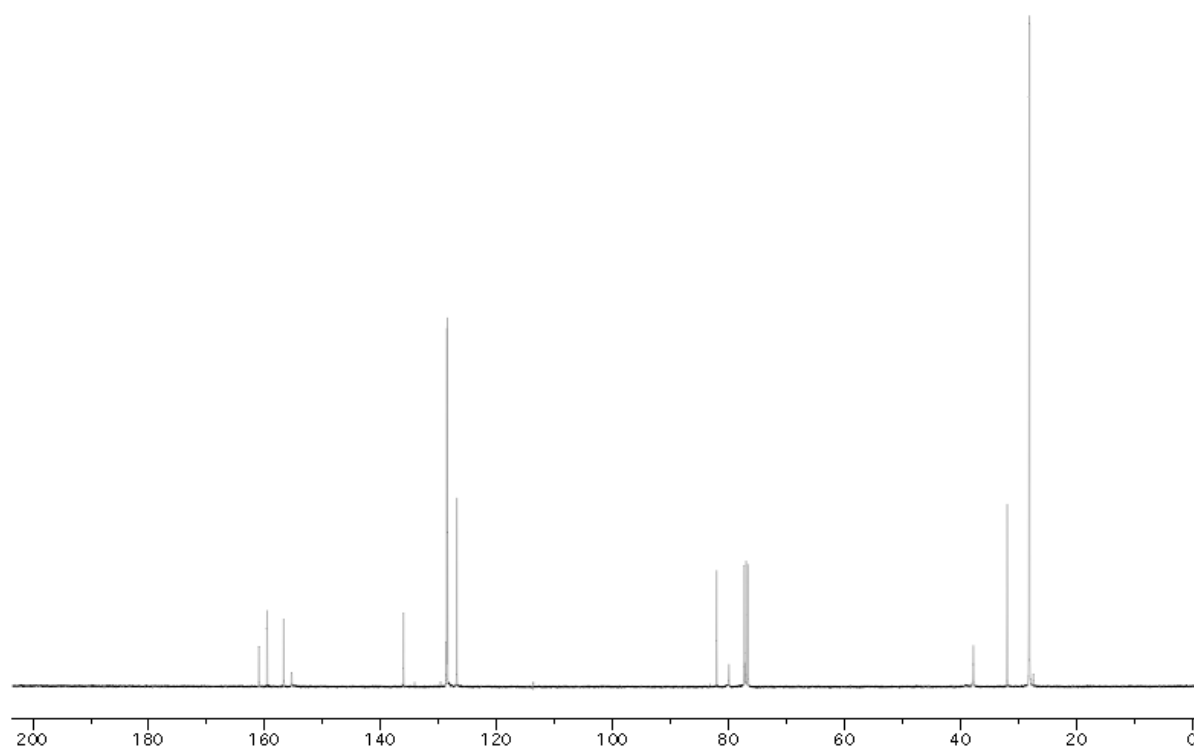

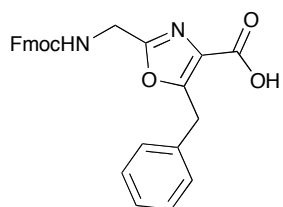

14

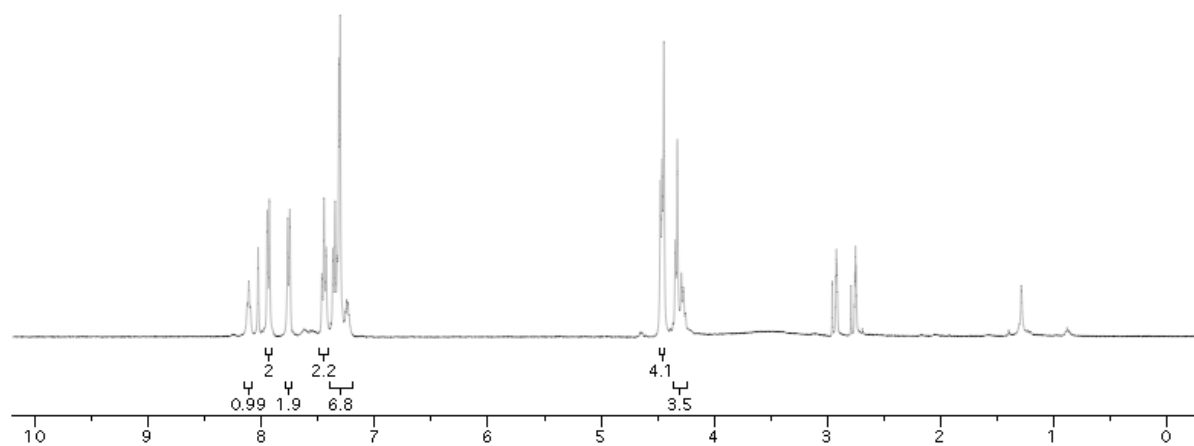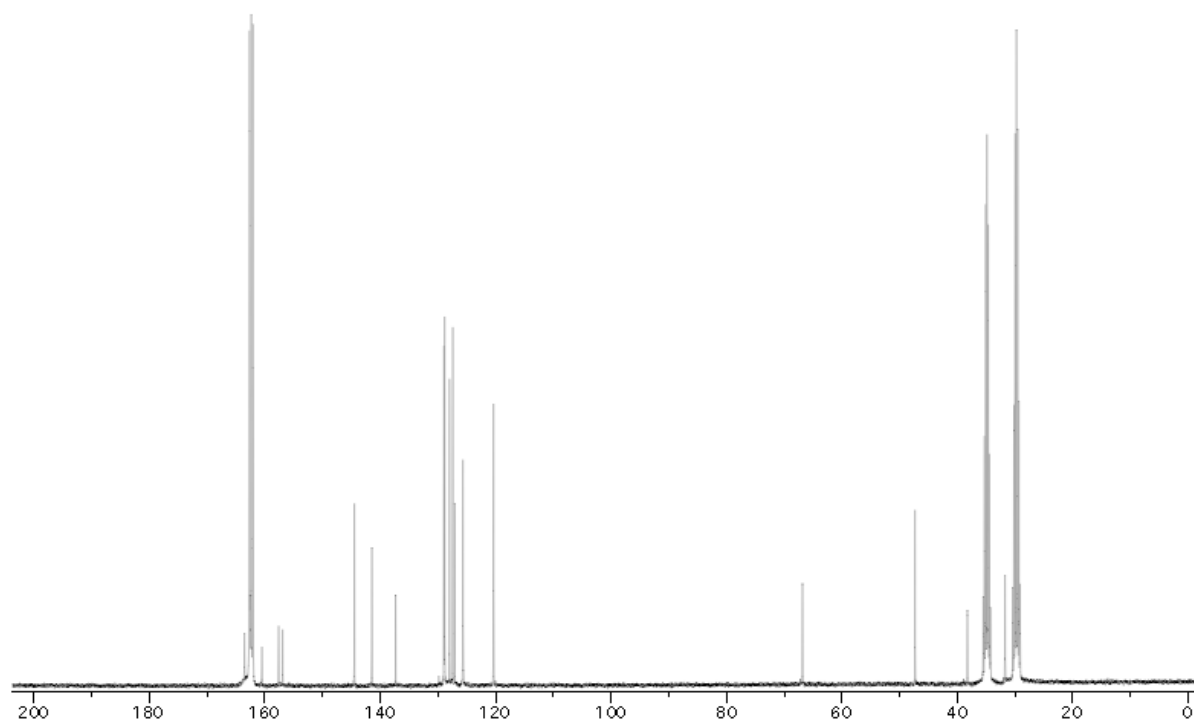

### Glycopeptidomimetic 2

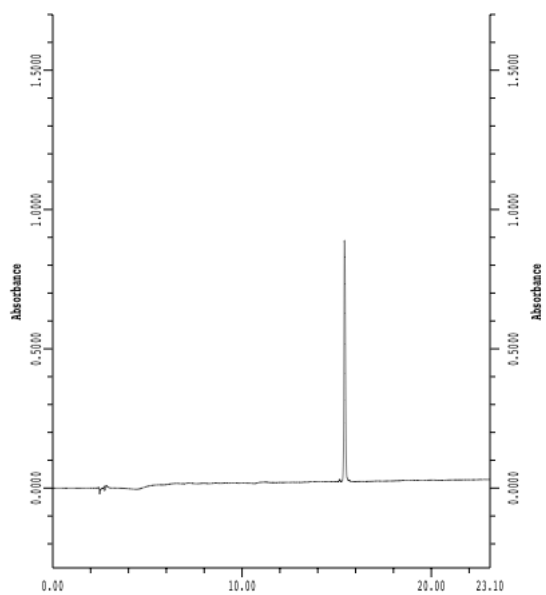

### Glycopeptidomimetic 3

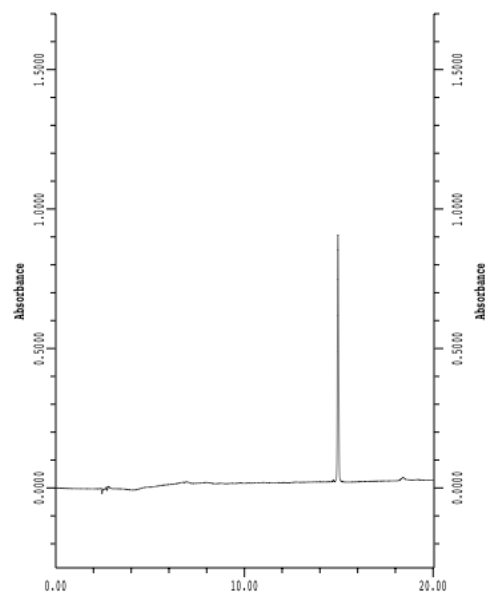

### Glycopeptidomimetic 4

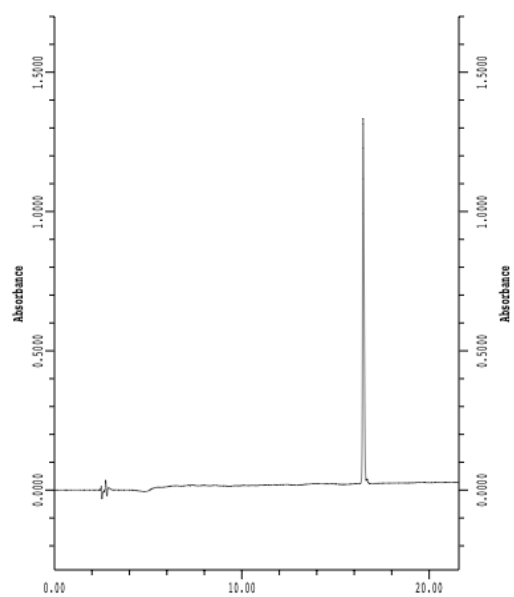

Supplement: c003640d.pdf [file c003640d.pdf]
